1 **Comparative Phylogenomic Synteny Network Analysis of Mammalian and**  
2 **Angiosperm Genomes**

3  
4

5 Tao Zhao, M. Eric Schranz\*

6 Biosystematics Group, Wageningen University, 6708 PB Wageningen, The Netherlands

7 \*Corresponding author: eric.schranz@wur.nl

8  
9

**Abstract**

10 **Background:** Synteny analysis is a valuable approach for understanding eukaryotic gene  
11 and genome evolution, but still relies largely on pairwise or reference-based comparisons.  
12 Network approaches can be utilized to expand large-scale phylogenomic microsynteny  
13 studies. There is now a wealth of completed mammalian (animal) and angiosperm (plant)  
14 genomes, two very important lineages that have evolved and radiated over the last ~170  
15 million years. Genomic organization and conservation differs greatly between these two  
16 groups; however, a systematic and comparative characterization of synteny between the  
17 two lineages using the same approaches and metrics has not been undertaken.

18 **Results:** We have built complete microsynteny networks for 87 mammalian and 107  
19 angiosperm genomes, which contain 1,464,753 nodes (genes) and 49,426,268 edges  
20 (syntenic connections between genes) for mammals, and 2,234,461 nodes and  
21 46,938,272 edges for angiosperms, respectively. Exploiting network statistics, we present  
22 the functional characteristics of extremely conserved and diversified gene families. We  
23 summarize the features of all syntenic gene clusters and present lineage-wide  
24 phylogenetic profiling, revealing intriguing sub-clade lineage-specific clusters. We depict  
25 several representative clusters of important developmental genes in humans, such as  
26 *CENPJ*, *p53* and *NFE2*. Finally, we present the complete homeobox gene family networks  
27 for both mammals (including Hox and ParaHox gene clusters) and angiosperms.

28 **Conclusions:** Our results illustrate and quantify overall synteny conservation and  
29 diversification properties of all annotated genes for mammals and angiosperms and show  
30 that plant genomes are in general more dynamic.

31 **Keywords:** synteny networks, genome evolution, gene family dynamics, phylogenetic  
32 profiling, mammals, angiosperms

## 33 Background

34 The patterns and differences of gene and genome duplication, gene loss, gene  
35 transpositions and chromosomal rearrangements can inform how genes and gene  
36 families have evolved to regulate and generate (and potentially constrain) the amazing  
37 biological diversity on Earth today. For comparative genomics, synteny reflects important  
38 relationships between the genomic context of genes both in terms of function and  
39 regulation and is often used as a proxy for the constraint and/or conservation of gene  
40 function [1, 2]. Thus, syntenic relationships across a wide range of species provide crucial  
41 information to address fundamental questions on the evolution of gene families that  
42 regulate important traits. Synteny data can also be very valuable for assessing and  
43 assigning gene orthology relationships, particularly for large multigene families where  
44 phylogenetic methods maybe non-conclusive [1, 3, 4]. Synteny was originally defined as  
45 pairs or sets of genes located on homologous chromosomes in two or more species, but  
46 not necessarily in the same order [5]. However, the current widespread usage of the term  
47 synteny, which we adopt, implies conserved collinearity and genomic context.

48 While the basic tenants of gene and genome organization and evolution are similar across  
49 major eukaryote lineages, there are also significant differences that are not fully  
50 characterized nor understood. For example, the length and complexity of genes and  
51 promoters, the types of gene families (shared or lineage-specific), transposon density,  
52 higher-order chromatin domains and the organization of chromosomes can differ  
53 significantly between plants, animals and other eukaryotes [6-9]. In general, genome  
54 organization and gene collinearity is substantially less conserved in plants than in  
55 mammals. One major characteristic of flowering plant genomes is the prevalent signature  
56 of shared and/or lineage-specific whole genome duplications (WGDs) [10-15]. While the  
57 genomes of mammalian vertebrates show evidence of only two shared and very old  
58 rounds of WGD; often referred to as “2R” [16-18]. The variation in genomic organization  
59 between lineages is partially due to differences in fundamental molecular processes such  
60 as DNA-repair and recombination, but also likely reflect the historical biology of groups  
61 (such as mode of reproduction, generation times and relative population sizes).  
62 Differences in gene family and genome dynamics have significant effects on our ability to  
63 detect and analyze synteny.

64 While the number of quality reference genomes is growing exponentially, a major  
65 challenge is how to detect, represent, and visualize synteny relations of all members from  
66 a gene family across many genomes simultaneously. Conventional dot plots display  
67 macroscale collinear blocks between/within only two genomes in two-dimensional  
68 images. Parallel coordinate plots (like CoGe SynFind [19, 20]) describe collinear blocks  
69 surrounding a locus identifier and visualize the blocks at the local genomic scale. With  
70 the abundance of new genomic data, the changes for multispecies collinearity  
71 visualization are only exacerbated. We have developed a network-based approach to  
72 organize and display local synteny [21, 22] and have applied it to understand the evolution  
73 of the entire MADS-box transcription factor family across 51 plant genomes as a proof of

74 principle of the method [22]. We identified several evolutionary patterns including  
75 extensive pan-angiosperm retention of certain gene clades, ancient retained tandem  
76 duplications and lineage-specific transpositions such as the floral patterning genes in  
77 Brassicaceae [22]. Our approach can be scaled to analyze not just one gene family, but  
78 all gene families across a lineage.

79 The aim of this study is to investigate and compare the dynamics and properties of the  
80 entire synteny networks of all annotated genes for mammals and angiosperms. To this  
81 end, we analyzed the syntenic properties of 87 mammalian and 107 plant genomes  
82 (Figure 1) which represent most major phylogenetic clades of both mammalian and  
83 angiosperm groups across ~170 million years of evolution [13, 23-25]. For mammals, the  
84 species used covered the three main clades of Afrotheria, Euarchontoglires, and  
85 Laurasiatheria, as well as first-branching groups like *Ornithorhynchus anatinus*  
86 (platypus). For angiosperms, the species also cover three main groups of Monocots,  
87 Superasterids, and Rosids, as well as first-branching groups such as *Amborella*  
88 *trichopoda* (Figure 1). Some clades are more heavily represented than others such as  
89 primates (human relatives) and crucifers (*Arabidopsis* relatives) due to research sampling  
90 biases. Regardless, most major lineages are represented. Also, there are differences in  
91 the overall quality and completeness of the genome assemblies used, but this was a  
92 factor we wanted to analyze and assess using synteny analysis.

93

94

## 95 Results and discussion

### 96 Genome collection, pairwise synteny comparisons

97 We used fully-sequenced genomes to investigate all syntenic blocks within and across  
98 genomes. Initially we searched public databases maintaining mammalian and  
99 angiosperms genome resources such as NCBI, Ensembl, CoGe and Phytozome.  
100 Candidate genomes had to contain downloadable complete predicted gene models and  
101 gene position annotations. Ultimately, we analyzed 87 mammalian genomes, presented  
102 according to the consensus species tree adopted from NCBI taxonomy (Figure 1,  
103 Supplemental Table 1) which included 1 Prototheia (*Ornithorhynchus anatinus*), 1  
104 Metatheria (*Sarcophilus harrisii*), 1 Xenarthra (*Dasypus novemcinctus*), 6 Afrotheria, 38  
105 Euarchontoglires and 40 Laurasiatheria species. For angiosperms, we analyzed 107  
106 genomes including 1 Amborellaceae (*Amborella trichopoda*), 26 Monocots (including 14  
107 Poaceae) and 80 eudicots (including 1 Proteales (*Nelumbo nucifera*), 23 Superasterids  
108 (Asterids and Caryophyllales), and 56 Rosids) (Figure 1, Supplemental Table 1).

109 We modified all peptide sequence files and genome annotation GFF/BED files with  
110 corresponding species abbreviation identifiers, followed by pairwise all-vs-all genome  
111 comparisons for synteny block detection [as described in 21, 22]. To assess the overall  
112 impact of phylogenetic distance, genome assembly quality and/or genome complexity,  
113 we summarized the number of syntenic gene pairs for all pairwise genome comparisons  
114 (7,569 times for mammals and 11,449 times for angiosperms) into color-scaled matrixes  
115 (Figure 2) organized using the same species phylogenetic order as in Figure 1.

116 The diagonal of the matrix represents self- vs. self-contrasts and indicates the number of  
117 retained duplicate genes, which is indicative of recent and/or ancient WGDs. The lighter  
118 orange and blue rows with fewer syntenic links could reflect key biological or genomic  
119 differences, but is much more likely to be due to poor quality genome assemblies. For  
120 example, the mammalian genomes of *O. anatinus*, *Galeopterus variegatus*, *Carlito*  
121 *syrichta*, *Manis javanica*, and *Tursiops truncatus* (Figure 2a) and for angiosperms  
122 *Humulus lupulus*, *Triticum urartu*, *Aegilops tauschii*, and *Lemna minor* (Figure 2b).

123 As shown in the matrixes, mammalian genomes overall are in general highly syntenic  
124 regardless of phylogenetic distance (Figure 2a) with primate vs primate comparisons  
125 showing marginally higher scores. Whereas plant genomes show more phylogenetic  
126 signal (e.g. monocots vs monocots and crucifers vs. crucifers), the impact of recent WGD  
127 (e.g. *Brassica napus*) and more variability overall (due to assemblies from different groups  
128 of researchers, different qualities, multiple independent WGDs) (Figure 2b). Note, that  
129 almost all plant genomes have higher intra-genome syntenic pair scores than all mammal  
130 intra-genome comparisons. We further checked genome characters by plotting syntenic  
131 gene percentage against Pfam annotation percentage for each genome (Supplemental  
132 Figure 1). Based on these results, we removed four poor-quality plant genomes (*H.*  
133 *lupulus*, *T. urartu*, *A. tauschii*, and *L. minor*) before proceeding to the next step of our  
134 analyses.

## 135 **Characterization of synteny networks**

136 The entire synteny networks are composed of all syntenic genes identified within all the  
137 syntenic blocks. Specifically, there are 1,464,753 nodes (genes) and 49,426,268 edges  
138 (syntenic connections between genes) for mammals, and 2,234,461 nodes and  
139 46,938,272 edges for angiosperms, respectively. To evaluate genomic conservation of  
140 gene families (for gene family assignments see Methods) over evolutionary time scales  
141 from the synteny network data, we introduce two estimators: average clustering  
142 coefficient ([Supplementary Figure 2](#)) and the percentage of genes in the family that are  
143 syntenic (syntenic percentage) for every gene-family ([Figure 3a](#)). A clustering coefficient  
144 is calculated for all nodes in the synteny network, as a measure of the degree to which  
145 nodes in a graph tend to cluster together. Genes can be mobilized (e.g. transposed) to  
146 other genomic contexts (e.g. unique or lineage-specific contexts) and thus will no longer  
147 be collinear or syntenic to other species or lineages. Thus, we use percentage (gene  
148 family members in the network/ total gene family members in the genomes) to quantify  
149 the proportion of the genes retaining synteny.

150 We then plotted the average clustering coefficient and retention percentage of all the gene  
151 families for the mammalian (11,830 gene families) and angiosperm (10,617 gene families)  
152 synteny networks ([Figure 3a](#)). Mammalian gene families overall have significantly higher  
153 clustering coefficients (mean 0.92 for mammals compared to 0.72 for angiosperms;  $P <$   
154  $0.001$ , Wilcoxon-Matt-Whitney test) and retention percentage (mean 0.88 for mammals  
155 compared to 0.71 for angiosperm;  $P < 0.001$ , Wilcoxon-Matt-Whitney test) than that of  
156 angiosperms ([Figure 3a](#)). This confirms that over large evolutionary time scales, genomic  
157 context is generally more conserved and constrained in mammals than for angiosperms.

158  
159 Syntenic dynamics of all gene families could be classified and compared to other gene  
160 families by our C-P (Clustering coefficient vs Percentage) quartile analysis method, as  
161 conceptually depicted in [Figure 3b](#). We defined values of the top 25% quartile as “high”,  
162 and the bottom 25% quartile as “low” for both mammals and angiosperms. The resulting  
163 four categories are highlighted ([Figure 3b](#)). The high clustering coefficient plus high  
164 retention percentage in the synteny network (“high-high” C-P values), indicates the both  
165 most syntenically conserved and most completely syntenic gene families, and thus the  
166 most inter-connected networks ([Figure 3b](#), [Supplementary Table 2](#)). Genes in the  
167 category of “high-low” C-P detect gene families where certain gene sub-families and/or  
168 phylogenetic clades are highly syntenic, but overall many gene members are absent from  
169 the clusters (thus a low percentage). Non-syntenically connected gene family members  
170 may be prone to transposition ([Figure 3b](#), [Supplementary Table 2](#)). In contrast, the  
171 category “low-high” C-P means that a high proportion of the gene family members are in  
172 the network, but not always well connected, for example due to tandem gene cluster  
173 expansions ([Figure 3b](#), [Supplementary Table 2](#)). Lastly, the category “low-low” C-P  
174 represent gene families that are distributed dispersedly (such as across pericentromeric  
175 regions) and thus non-syntenic, or represent young transpositions or lineage-specific

176 genes shared only between a small number or related species (Figure 3b, Supplementary  
177 Table 2).

### 178 ***Comparative synteny dynamics of gene families of mammals and angiosperms***

179 We investigated if gene families with similar C-P synteny dynamics (high-high, high-low,  
180 low-high, and low-low), might also have similar functional annotations (e.g. GO terms)  
181 [26, 27]. We tested for pathway and gene-function enrichment of gene families within  
182 each of the four C-P profiles for both mammals and angiosperms (Figure 3c and 3d).  
183 Over-representative terms are shown in a word-cloud with font sizes indicating the p-  
184 value (Fisher's exact test with Bonferroni correction). For mammals, gene families with  
185 "high-high" profiles are functionally enriched in DNA metabolic processes, such as "DNA  
186 replication" and "DNA repair". Interestingly Alzheimer disease-amyloid secretase pathway  
187 (P00003) genes are enriched in this category (Figure 3c). By contrast, "low-low" gene  
188 families include functions in immune responses and pathways (e.g., "cellular response to  
189 xenobiotic stimulus", "Collagen degradation", "Biological oxidations"), enriched protein  
190 classes are "major histocompatibility complex antigen (PC00149)" and "cell adhesion  
191 molecule (PC00069)" (Figure 3c). The mammalian "high-low" group is enriched for genes  
192 that function in DNA-templated gene transcription and DNA binding, such as KRAB box  
193 transcription factors (PC00029) [28] (Figure 3c). As transcription factors bind specific  
194 promoters and thus regulate a variety of developmental and environmental processes.  
195 Moreover, transcription factors commonly consist of multiple members. Thus, it can be  
196 hypothesized that some gene family members are highly conserved and genomically  
197 constrained, while other members are versatile and transposed into new genomic  
198 positions. Finally the "low-high" group is enriched for genes involved in translation (e.g.  
199 "peptide biosynthetic process", "peptide metabolic process") and ribosomal component  
200 (e.g. "ribosomal subunit", "ribonucleoprotein complex"), most enriched Reactome  
201 Pathways are closely related to translation processes (e.g. "eukaryotic translation", "Cap-  
202 dependent translation initiation"), as well as infectious disease related pathways (e.g.  
203 "Influenza infection", "Influenza life cycle", and "Influenza viral RNA transcription and  
204 replication") (Figure 3c).

205 The functional enrichment analysis of angiosperms shows a different pattern than for  
206 mammals (Figure 3d). Plant "high-high" gene families are enriched for organelle  
207 components (e.g. "organelle part", "intracellular organelle", "chloroplast part", "organelle  
208 organization", and "plastid part"), as well as acetyltransferase, transferase and  
209 methyltransferase proteins for the processes such as "DNA repair", "ncRNA metabolic  
210 process" and "methylation" (Figure 3d). Many of these categories are plant-specific  
211 related to photosynthesis. By contrast, the plant "low-low" group is enriched by defense  
212 response genes such as "peptidase inhibitor activity", "endopeptidase inhibitor", and "ADP  
213 binding". "Low-high" gene families function in nuclear part components (e.g. "intracellular  
214 organelle lumen", "organelle lumen"), biosynthetic process (e.g. "organonitrogen  
215 compound biosynthetic process", "cellular aromatic compound metabolic process"), cell  
216 surface proteins (e.g. "synthesis of glycosylphosphatidylinositol (GPI)) and gene

217 expression (e.g. “RNA polymerase complex”, “nucleic acid binding”, “RNA polymerase II  
218 transcription initiation”). Interestingly, “high-low” part of plant genes function in cell wall  
219 (e.g. “plant-type primary cell wall biogenesis”, “cellulose biosynthetic process”, “beta-  
220 glucan biosynthetic process”) (Figure 3d). Classifying and characterizing gene families  
221 according to their “synteny network C-P” scores allows for the relative comparisons of  
222 any gene family to all others across a lineage (Supplementary Table 2). The degree of  
223 conservation likely reflects functional constraints of the family. For example, gene families  
224 with a high-high C-P are responsible for fundamental functions (i.e. DNA repair and  
225 photosynthesis.) and low-low C-P gene families are highly mobile and functionally flexible  
226 (such as both animal and plant NLR family defense-related receptors [29] and plant  
227 P450s and F-box genes) (Supplementary Table 2).

### 228 ***Comparative synteny network clustering***

229 We next performed a clustering analysis for the entire mammal and angiosperm synteny  
230 networks. We used Infomap [30] as the clustering algorithm due to its efficiency and  
231 accuracy in handling large graphs with millions of nodes and because it has consistently  
232 out-performed other available methods [31]. The clustering results for mammals and  
233 angiosperms are summarized and compared in terms of cluster-size distributions (Figure  
234 4a and 4b), corresponding clustering coefficients (Figure 4c and 4d), and number of  
235 species included per cluster (Figure 4e and 4f).

236 Mammalian genomes have a prevalent peak of syntenic gene families that are present  
237 only once per taxa (single copy orthologous gene cluster peak shaded in cyan, Figure  
238 4a). To the right, there is a second modest peak of duplicated (ohnolog) genes due to the  
239 ancient 2R WGD events (shaded in bright yellow, Figure 4a). These two peaks could be  
240 further explained by Figure 4c and Figure 4e that depict the corresponding average  
241 clustering coefficient and number of species, respectively. We observe that the peak in  
242 cyan in Figure 4a is accompanied by a steady increasing trend of the clustering coefficient  
243 and the number of species involved (Figure 4c). A similar trend was observed for the  
244 clusters forming the peak in yellow due to WGD (Fig 4a). On the far left there is the rather  
245 modest proportion of lineage specific genes (clusters of syntenic genes between only a  
246 subset of mammalian species or clade(s) (shaded in purple, Figure 4a). On the far right  
247 are large multigene clusters usually with multiple syntenic gene copies conserved across  
248 multiple species due to tandem duplications such the well-known Hox-genes (shaded in  
249 olive green, Figure 4a). Representative examples are labeled on the curve, and further  
250 depicted in Figure 4g and Figure 4h.

251 In contrast, angiosperm genomes show a very large proportion of lineage-specific clusters  
252 on the far left (shaded in purple, Figure 4b). The clustering coefficients for these clusters  
253 is often above the threshold of “high” (top 25%, which was defined earlier for the C-P  
254 classification) (Figure 4d) and the cluster size for these lineage-specific clusters is mostly  
255 between 10 to 30 (shaded in cyan, Figure 4f), reflecting the number of species and gene  
256 copies within particular phylogenetic groups such as Fabaceae, Brassicaceae, and  
257 Poaceae. Next, a rather broad peak of gene clusters are observed that are conserved

258 across many lineages (Figure 4b) of genes that are single-copy in some lineages and in  
259 two/more copies in other lineages due to WGD. Also, there is a larger proportion of large  
260 multigene families seen to the far right (shaded in olive green, Figure 4b). There is a  
261 variation for the number of species per cluster for these large multi-gene families in  
262 angiosperms (Figure 4f).

263 The combination of cluster size, corresponding clustering coefficient, and number of  
264 involved species were used to select representative synteny clusters for mammals. As an  
265 example of a lineage-specific cluster we show *CENPJ* (as an example of a primate  
266 lineage-specific cluster), *p73* as an example of a single copy conserved cluster, *p53-p63*  
267 as an example of 2-ohnologs-retained WGD cluster, *ATF2-ATF7-CREB5* as an example  
268 of 3-ohnolog-retained WGD cluster, and *NFE2-NFE2L1-NFE2L2-NFE2L3* as example of  
269 4-ohnolog-retained WGD cluster (Figure 4a, 4g and 4h). It has been reported that *CENPJ*  
270 regulates brain size [32, 33], and primates have relatively larger brains [34, 35]. It is  
271 interesting that we found primates formed a lineage-specific *CENPJ* synteny cluster  
272 (Figure 4g and 4h) compared to other mammals. This indicates that *CENPJ* underwent a  
273 gene transposition event at or near the divergence of the primate ancestor from other  
274 mammals. Thus, the primate gene copy is in a unique genomic context facilitating  
275 potential new/altered regulatory patterns and gene functions. The *p53*, *p63* and *p73*  
276 genes compose a family of transcription factors involved in cell response to stress and  
277 development [36, 37]. *p63* is previously perceived close related to *p73* because of the  
278 similar protein domain compositions, however our result shows *p63* and *p53* are ohnolog  
279 duplicates retained after WGD. Other ohnolog clusters with strong support from our  
280 analyses include *ATF2-ATF7-CREB5*, transcription factors with broad roles such as  
281 activating CRE-dependent transcription, cancer progression and immunological memory  
282 [38-41] and *NFE2-NFE2L1-NFE2L2-NFE2L3*, also with broad roles such as regulation of  
283 oxidative stress, aging and cancer cell proliferation [42-44].

#### 284 **Comparative phylogenetic profiling of synteny clusters**

285 To further visualize and understand genomic diversity, we performed phylogenetic  
286 profiling of all synteny clusters of mammals and angiosperms (Figure 5a and 5b). Blue  
287 columns indicate conserved single copy syntenic clusters, orange columns indicate  
288 retained duplicate copy clusters (i.e. conserved ohnologs from WGD), and the red  
289 columns signify conserved clusters with more than two copies (e.g. conserved tandem  
290 clusters) (Figure 5a and 5b). Nearly empty rows of the less-syntenic species are  
291 consistent with the pairwise matrix in Figure 2.

292 For mammals, a very large proportion of all genes are syntenic and single copy (Figure  
293 5a) as mentioned above. Smaller proportions of mammalian genomes are conserved and  
294 syntenic for duplicates or larger conserved multi-gene families. Interestingly, lineage-  
295 specific clusters were observed for most of the included mammalian clades. For example,  
296 we found lineage-specific clusters for Primates (such as the *CENPJ* example discussed  
297 above), Rodentia, Vespertilionidae, Felidae, Camelidae, and Bovidae (Figure 5a).



298 In contrast, in angiosperms only ~10% of clusters are syntenically conserved between  
299 eudicot and monocot species (Figure 5b). The remaining clusters are mostly lineage-  
300 specific clusters that appear as discrete columns (Figure 5b). This indicates that  
301 angiosperm genomes are highly fractioned and reshuffled, with abundant examples of  
302 specific clusters for particular phylogenetic lineages/plant families, such as  
303 Amaranthaceae, Brassicaceae, Poaceae, Fabaceae, Rosaceae, and Solanaceae (Figure  
304 5b). Results also highlight species with more gene copies per cluster (e.g. orange/red  
305 rows), likely due to recent WGD events such as for *G. max*, *B. napus* and *P. trichocarpa*  
306 (Figure 5b).

307 Traditional phylogenetic profiling data typically show only the presence/absence of a gene  
308 family. Whereas, our synteny-based phylogenetic profiling is based on conserved  
309 genomic collinearity of gene families across lineages which provides potential novel  
310 information about changes of genomic context (transpositions and/or expansions) or the  
311 origin of “novel genes” of specific gene families. Such changes in genomic context provide  
312 intriguing candidate gene sets for investigating trait evolution.

### 313 **Synteny network for homeobox genes of mammals and angiosperms**

314 To summarize and further illustrate synteny cluster properties between mammals and  
315 angiosperms species, we display synteny networks for the entire homeobox multi-gene  
316 family for both lineages (Figure 5c and 5d). For the mammals, the well-known Hox  
317 clusters, derived from WGD and tandem duplications [45, 46], were visualized as two  
318 huge clusters (*Hox1-8* and *Hox9-13*) connected by EVX gene cluster (*EVX1* and *EVX2*)  
319 (Figure 5c). ParaHox genes [47] *PDX1*, *GSX1*, and *GSX2* form one highly inter-connected  
320 cluster (Figure 5c), while the other three ParaHox genes *CDX1*, *CDX2*, and *CDX3* form  
321 respective independent clusters (Figure 5c). Moreover, we have found the synteny cluster  
322 of *DLX1-4*, and *DLX6* [48], cluster of *LHX2*, 6, and 9 [49], cluster of *NKX2-1* and 2-4 [50,  
323 51], and cluster of *CERS5* and 6 [52] (Figure 5c).

324 Plant homeodomain proteins have been classified in the literature into various groups  
325 based on sequence similarity of their homeodomains [53-55]. Here the syntenic  
326 connections across the full set of homeobox genes provide novel insights to the origin  
327 and relationships of all homeobox subfamilies (Figure 5d). Some examples include  
328 conserved clusters (*OCP3*, *RPL*, and *ATH1*) [56-58]; WGD-derived clusters (*KNAT3-5*,  
329 *HAT1-3-HB2-HB4*, *HDG1-HDG7-ANL2-FWA*, and *HDG2-HDG3-PDF2-ATML1*) [59, 60];  
330 eudicot-specific clusters (*STM*, *KNAT7*, *KNAT2-KNAT6*, *WOX1-PFS2* and *HB22-HB51*)  
331 [61-63], and monocot-specific clusters (i.e. *Os01g60270*, *Os06g04850*, *Os08g19590*)  
332 [64] (Figure 5d).

333 Synteny networks provide a complementary method to more traditional phylogenetic  
334 approaches for investigating the ancestry and homology relationships of (large) multi-  
335 gene families. For example, synteny information identified ancient tandem origins and  
336 lineage-specific transpositions of angiosperm MADS-box genes [22, 65, 66]. We have  
337 analyzed the mammalian homeobox genes. We clearly show and verify that the

338 mammalian Hox genes appear as inter-connected synteny super-clusters and also find  
339 synteny connections to the ParaHox genes, consistent with the numerous previous  
340 reports [45-47]. In contrast, for plants we did not find any prominent tandem origin of  
341 homeobox clades, but did identify several examples of WGD-derived gene expansions  
342 and family-specific transpositions.

343

## 344 **Conclusions**

345 Synteny analysis of multi-species genomics datasets has led to major advances in our  
346 understanding of evolutionary patterns and processes. However, few studies have  
347 systematically assessed and compared genomic properties across kingdoms [7]. Synteny  
348 network statistical parameters provide new possibilities for systematically evaluating gene  
349 (syntenic) diversification and/or conservation patterns over long evolutionary time scales.  
350 In this study, we have presented an analytic framework for large-scale synteny  
351 comparisons using network analysis of all suitable mammalian and angiosperm genomes.  
352 Assessment metrics based on synteny intuitively illustrate genome contiguity and copy  
353 number depth due to (paleo)polyploidy. The C-P method provides a means to  
354 characterize gene family dynamics in a comparative evolutionary context. We have  
355 displayed and compared features of all synteny clusters from these two important  
356 lineages and performed their clade-wide phylogenetic profiling. The results illustrate the  
357 dramatic differences in genomic dynamics within and between the two groups,  
358 exemplified by synteny networks of primate-specific gene transpositions (i.e. *CENPJ*),  
359 extant ohnologs surviving 2R of mammals, and for all mammal and angiosperm  
360 homeobox genes.

361 Dissection of the properties of all synteny clusters provides intriguing insights into the  
362 differing genomic architectures and dynamics of mammal and flowering plants. Examples  
363 in this study are just the tip of the iceberg. Much remains to be explored, but this study  
364 provides an intriguing foundation for future investigations to better understand genome  
365 evolution and elucidate regulatory mechanisms underlying diverse evolutionary biological  
366 processes. Such approach can further be extended to other phylogenetic groups and  
367 deeper evolutionary time scales.

368

369

## 370 **Methods**

### 371 **Genome resources**

372 All reference genomes were downloaded from public repositories ([Supplemental Table](#)  
373 [1](#)). For each genome, we needed a FASTA format file containing peptide sequences of  
374 all predicted gene models, as well as a genome annotation file (GFF/BED) showing the  
375 positions of all the genes. Original gene names in the FASTA file have been modified into  
376 a prefix (unique identifier indicating species) and numeric GenBank gene ID. An in-house  
377 script was used for batch downloading genomes and modifying gene names.

378 All mammalian genomes were downloaded from NCBI. Initially we utilized the total list of  
379 available mammal genomes on NCBI (<https://www.ncbi.nlm.nih.gov/genome/browse/>).  
380 Using the list with our script, some records did not contain the complete required  
381 information for our analysis (i.e. no genome annotation files, or no FASTA file of total  
382 peptide sequences). In the end, we retrieved 87 mammalian genomes suitable for our  
383 analysis. Angiosperm genomes were collected from various public databases such as  
384 Phytozome (<https://phytozome.jgi.doe.gov/pz/portal.html> ([Supplemental Table 1](#)).

### 385 **Peptide sequence annotation**

386 For gene family annotation, we used HMMER (hmmscan) to perform domain annotations  
387 against the Pfam database (version downloaded: Pfam 30.0, Pfam-A with 16,306 entries)  
388 for all the peptides of the utilized genomes. Domains identified from one sequence were  
389 combined, and used for gene family annotation. Multiple occurrences of the identical  
390 domain within one protein were counted only once.

### 391 **Pairwise comparison, synteny blocks detection, and network construction**

392 RAPSearch2 was used to perform all inter- and intra- pairwise all-vs-all protein similarity  
393 searches. MCScanX was used for synteny block detection with default settings (window  
394 size: 50, number of match genes:  $\geq 5$ ). All outputting collinear files were integrated and  
395 curated into one tabular-format file, each row contains information about "Block\_ID",  
396 "Block\_Score", and syntenic gene pairs. This file creates a database which contains the  
397 entire syntenic nodes and syntenic connections derived from the input genomes. Detail  
398 procedures can be referred to a Github tutorial ([https://github.com/zhaotao1987/SynNet-](https://github.com/zhaotao1987/SynNet-Pipeline)  
399 [Pipeline](#) ).

### 400 **Network statistics**

401 Network statistical analysis was carried out in the R environment (<http://www.r-project.org>),  
402 using the R package "igraph" [67]. We performed the analysis of the networks of mammal  
403 genomes and angiosperm genomes separately. The entire network must first be  
404 simplified to reduce duplicated edges (same syntenic pair may be derived from multiple  
405 detections), followed by the calculation of clustering coefficient, and node degree of each  
406 node.

407 We mapped gene family annotations to all the nodes, and computed the percentage for  
408 each gene family using its total occurrence in the synteny network against its total  
409 occurrence from the step “Peptide sequence Annotation”. We filtered gene families with  
410 at least 50 nodes and plot percentage against average clustering coefficient for all these  
411 gene families. Quartiles of percentage and average clustering coefficient was estimated  
412 according to their distributions. We describe values over Q3 (highest 25%) as high, and  
413 values below Q1 (lowest 25%) as low.

#### 414 **Gene annotation enrichment analysis**

415 Gene families of special interest (“high-high”, “high-low”, “low-high”, and “low-low”) were  
416 extracted from the total analysis. We then mapped gene(s) from the model species *H.*  
417 *sapiens* (for mammals) or *A. thaliana* (for angiosperms) to each of the gene families. We  
418 then performed online PANTHER overrepresentation test (<http://pantherdb.org/>) for each  
419 of the gene lists, with Bonferroni correction for multiple testing. In addition to the  
420 annotation of GO enrichment (biological process, molecular function, and cellular  
421 component), we also included analysis of “Reactome pathways”, “PANTHER pathways”,  
422 and “PANTHER protein class”. Results containing significant enriched terms was  
423 downloaded and illustrated as word clouds, by the R package “tagcloud”. Font sizes  
424 determined by “-log<sub>10</sub>(p-value)”. We depicted a maximum of the top 40 most significant  
425 terms.

#### 426 **Network clustering and phylogenetic profiling**

427 We used the infomap method to split the entire network, consisting of millions of nodes,  
428 into clusters [30]. Clustering results were determined by topological edge connections,  
429 edges were unweighted and undirected. All synteny clusters were decomposed into  
430 numbers of involved syntenic gene copies in each genome. Dissimilarity index of all  
431 clusters was calculated using the “Jaccard” method of the vegan package [68], then  
432 hierarchically clustered by “ward.D”, and visualized by “pheatmap”. We illustrate all the  
433 clusters of mammals (cluster size  $\geq 2$ ), and all angiosperm clusters with size  $\geq 4$ .

434

435

436 **Figure Legends**

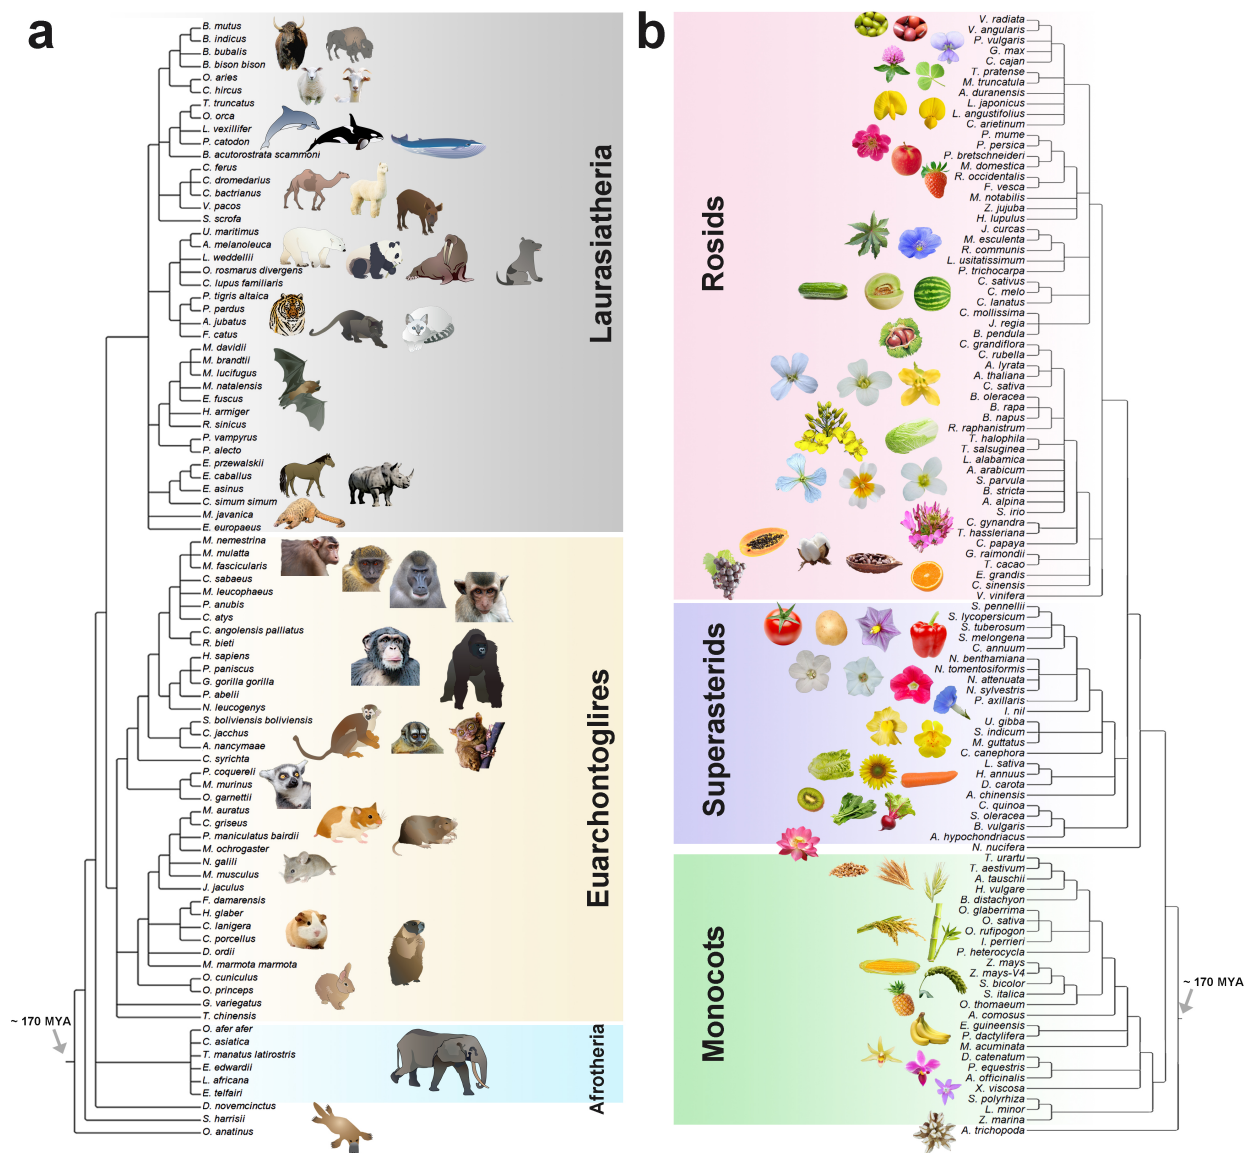

437

438 **Figure 1 Phylogenetic relationships of mammal and angiosperm genomes**  
 439 **analyzed.** (a) Mammal genomes used, highlighting the three main placental clades  
 440 Afrotheria, Euarchontoglires and Laurasiatherias. (b) Angiosperm genomes used,  
 441 highlighting the three main clades Monocots, Superasterids and Rosids.

442

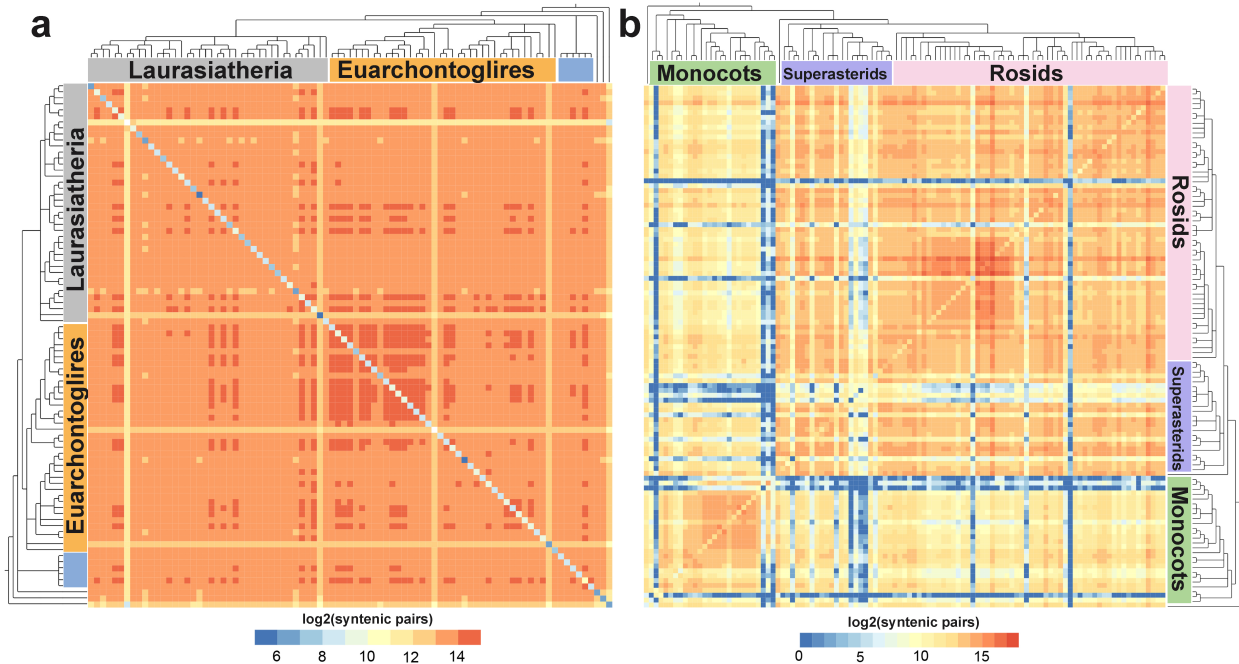

443

444 **Figure 2 Pairwise synteny comparisons of mammal and angiosperm genomes.** (a)  
445 Pairwise synteny comparison across Mammal genomes. (b) Pairwise synteny  
446 comparison across Angiosperm genomes. The logarithmic color-scale indicates the  
447 number of syntenic gene pairs. Species are ordered according to the consensus  
448 phylogeny (Figure 1). Overall, average synteny is much higher across mammals than  
449 plants. Also, there is a stronger phylogenetic signal seen for plant genomes. The method  
450 also allows for easy detection of potentially low-quality genomes (overall lower syntenic  
451 pair scores). The diagonal for both plots represents intra-genome comparisons which can  
452 detect potential recent and ancient WGDs. Note, that almost all plant genomes have  
453 higher intra-genome syntenic pair scores than all mammal intra-genome comparisons.

454

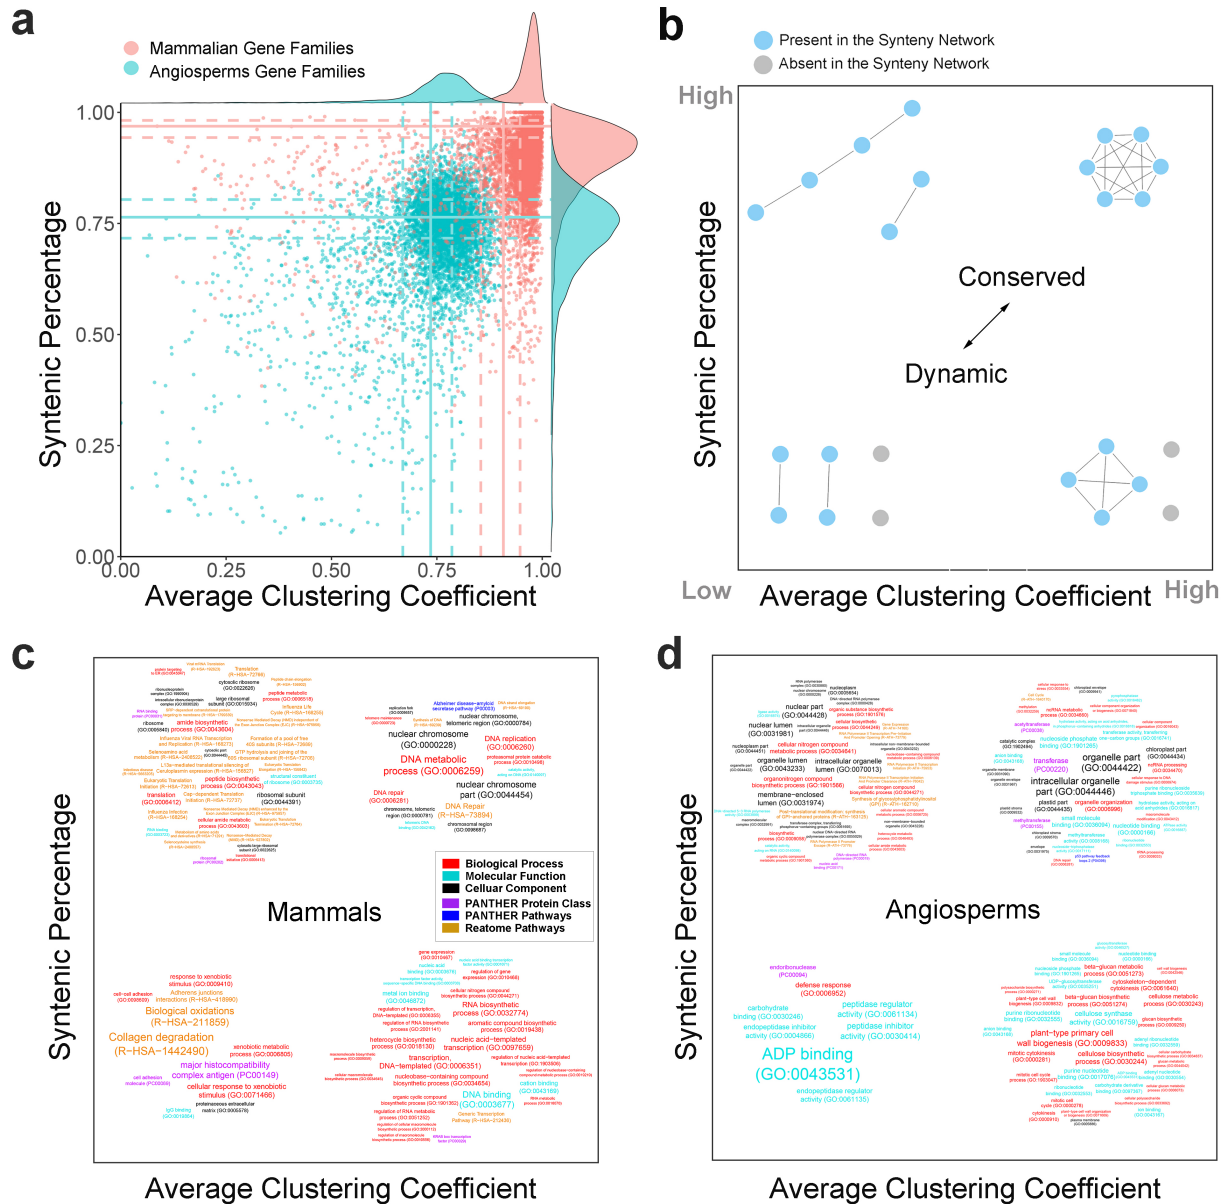

455

456 **Figure 3 Network properties of gene families from mammal and angiosperm**  
 457 **genomes.** (a) Distributions of gene family dynamics of mammal (11,830 in red) and  
 458 angiosperm (10,617 in blue) gene families plotted using percentage of syntenic genes  
 459 and average clustering coefficients per family. Quartiles of average clustering coefficient  
 460 and syntenic percentage for both mammals and angiosperms are indicated by dashed  
 461 (25%/75%) and solid (median) lines. (b) Conceptual model depicting different patterns of  
 462 synteny network connectivity, according to data distribution, with further analysis based  
 463 on 25% quartiles. (c, d) Comparative word clouds based on upper and lower quartiles for  
 464 functional enrichment of significant terms with representative C-P profiles for mammals  
 465 (c) and angiosperms (d). Font sizes are representative of adjusted p-values.

466

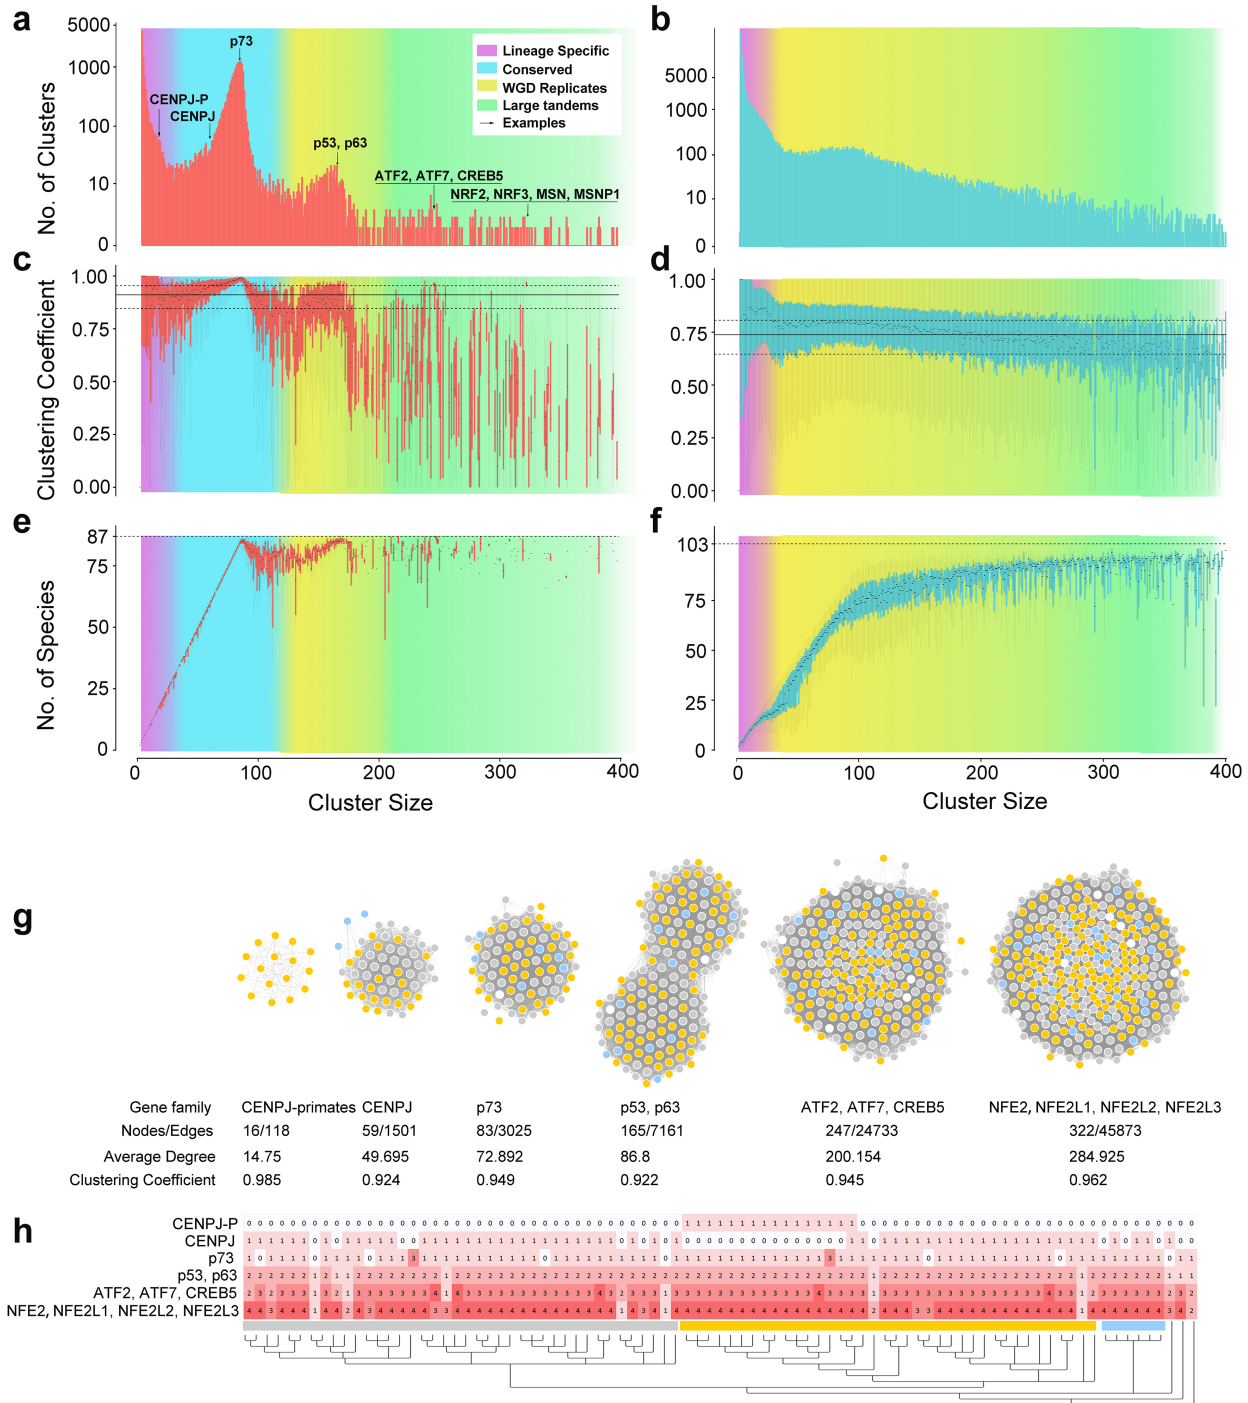

467

468 **Figure 4 Synteny cluster statistics of mammal and angiosperm genomes and**  
 469 **representative mammalian synteny clusters.** Approximate size ranges for clusters of  
 470 lineage-specific, conserved, WGD replicates, and large tandem genes are shaded in  
 471 purple, cyan, yellow, and olive green, respectively. (a) Sizes distribution of all mammalian  
 472 gene syntenic clusters. Representative examples are pointed and labeled on the curve.  
 473 (b) Sizes distribution of all angiosperms gene syntenic clusters (c) Boxplot of clustering



474 coefficient by mammalian cluster sizes. (d) Boxplot of clustering coefficient by angiosperm  
475 cluster sizes. (e) Number of involving genomes for mammalian clusters by cluster sizes.  
476 (f) Number of involving genomes for angiosperm clusters by cluster sizes. (g) Six  
477 representative and diverse mammalian clusters of CENPJ (primate-specific one and the  
478 others), p73, p53-p63, ATF2-ATF7-CREB5, and NFE2-NFE2L1-NFE2L2-NFE2L3. Total  
479 number of nodes, edges, average degree, and clustering coefficient are indicated  
480 accordingly below. (h) Phylogenetic profiling of the clusters from (g), a color gradient of  
481 red indicates the number of syntelogs in each species.

482

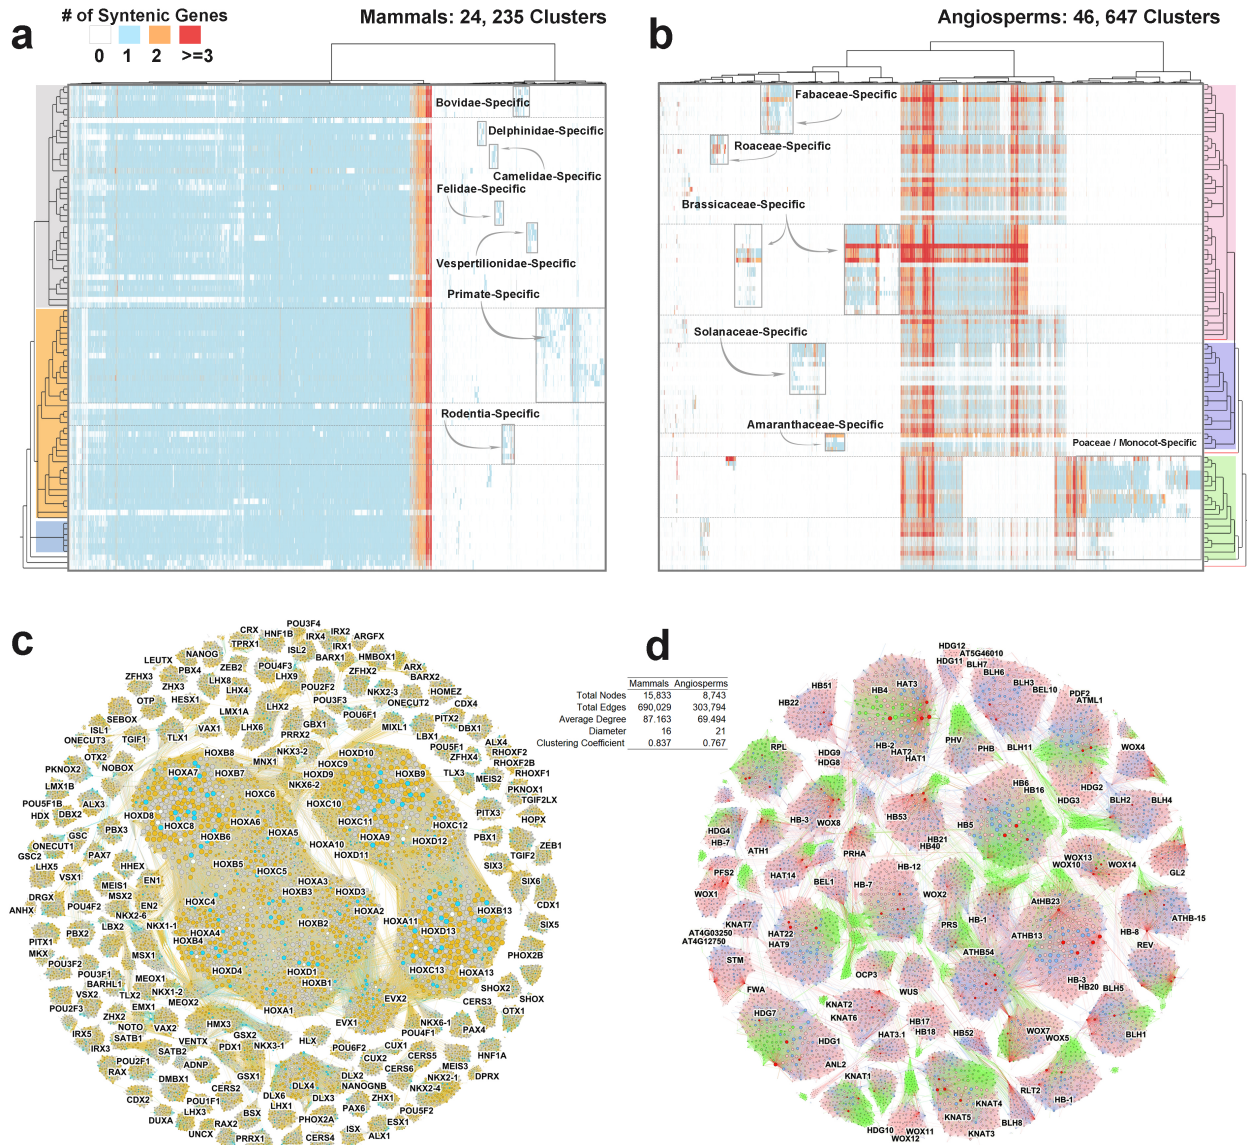

483

484 **Figure 5 Phylogenetic profiling of all syntenic clusters and complete Homeodomain**  
 485 **multigene family syntenic networks from mammal and angiosperm genomes. (a)**  
 486 **Phylogenetic profiling of all mammalian clusters (size >= 2). Groups of lineage-specific**  
 487 **clusters are boxed and labeled. (b) Phylogenetic profiling of all angiosperm clusters (size**  
 488 **>= 3). Groups of lineage-specific clusters are boxed and labeled. (c, d) Syntenic network**  
 489 **of all homeo-domain proteins for mammals (c) and angiosperms (d), representative *H.***  
 490 ***sapiens* and *A. thaliana* genes are labeled, respectively.**

491

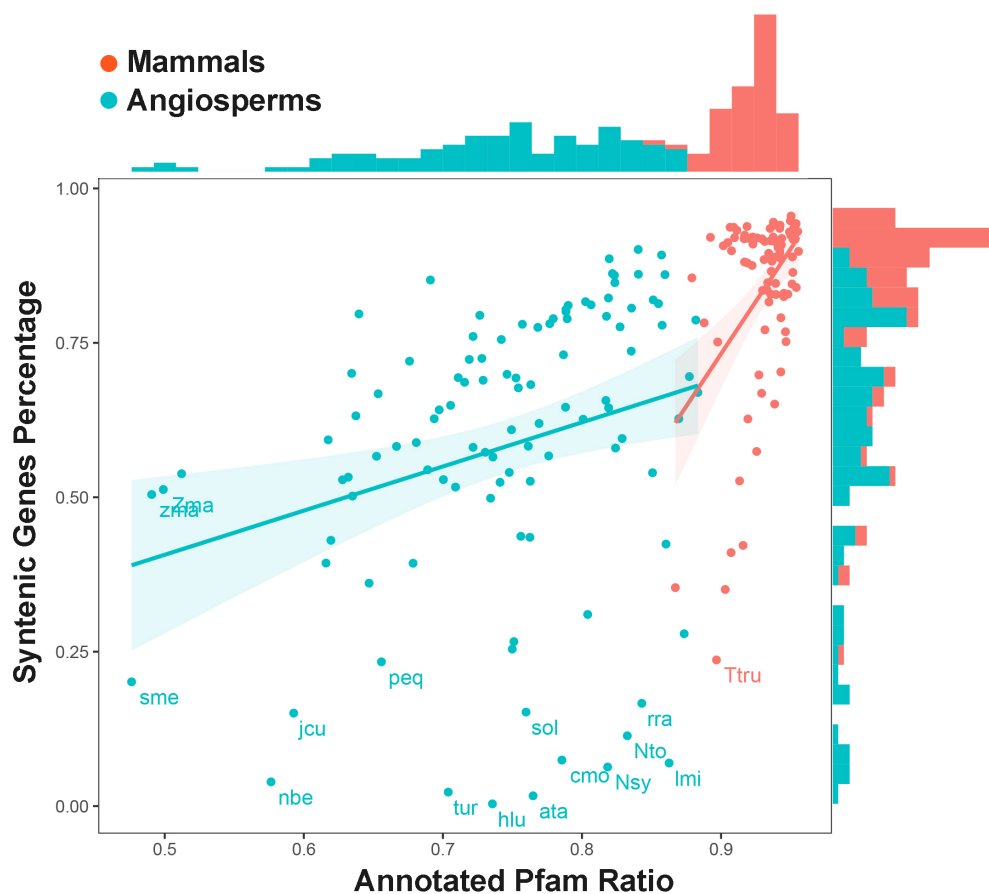

492

493 **Supplementary Figure 1** Plot of percentage syntenic genes again annotated (by Pfam)  
494 percentage of all genomes. Species were highlighted with abbreviated names if syntenic  
495 genes percentage lower than 0.25 or annotated proteins (by Pfam) lower than 0.5.

496

497

$$C_i = \frac{2L_i}{k_i(k_i - 1)}$$

$$\bar{C}_i = \frac{1}{4}(1 + 1 + 0.33 + 0) = 0.58$$

$C_i$ : Clustering coefficient of node  $i$

$K_i$ : Degree/Number of neighbors of node  $i$

$L_i$ : Number of edges between the  $K_i$  neighbors of node  $i$

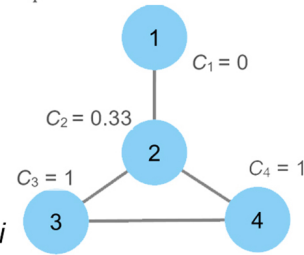

498

499 **Supplementary Figure 2** Schematic diagram for the calculation of the average clustering  
500 coefficient.

501 **Supplementary Table 1** Mammalian and angiosperm genomes used in this study

502 **Supplementary Table 2** Gene families with significant C-P features of mammals and  
503 angiosperms.

#### 504 **Declarations**

505 *Ethics approval and consent to participate*

506 Not applicable.

507 *Availability of data and material*

508 Data-sets and computer code used in this study are available at DataVerse:  
509 (<https://dataverse.harvard.edu/privateurl.xhtml?token=308d70cc-f489-435d-b7a5-f4fc5acd4842>). This includes the modified FASTA and BED files of all mammal and  
510 angiosperm reference genomes. The scripts for network database preparation (pairwise  
511 comparison, synteny block detection, and data integration), Pfam domain annotation,  
512 network clustering and statistics, phylogenetic profiling, and for the figure preparation (if  
513 applicable) are all included.  
514

515 *Competing interests*

516 The authors declare that they have no competing interests.

517 *Authors' contributions*

518 TZ and MES designed the study, TZ assembled the genomic data and performed the  
519 analysis. TZ and MES wrote the paper. All authors read and approved the final  
520 manuscript.

521 *Acknowledgements*

522 TZ was supported by China Scholarship Council. Symbols for diagrams courtesy of the  
523 Integration and Application Network ([ian.umces.edu/symbols](http://ian.umces.edu/symbols)).

## 524 References

- 525 1. Dewey CN: Positional orthology: putting genomic evolutionary relationships into context. *Brief*  
526 *Bioinform* 2011, 12:401-412.
- 527 2. Lv J, Havlak P, Putnam NH: Constraints on genes shape long-term conservation of macro-  
528 synteny in metazoan genomes. *BMC Bioinformatics* 2011, 12 Suppl 9:S11.
- 529 3. Koonin EV: Orthologs, paralogs, and evolutionary genomics. *Annu Rev Genet* 2005, 39:309-338.
- 530 4. Gabaldón T, Koonin EV: Functional and evolutionary implications of gene orthology. *Nature*  
531 *Reviews Genetics* 2013, 14:360-366.
- 532 5. Passarge E, Horsthemke B, Farber RA: Incorrect use of the term synteny. *Nature genetics* 1999,  
533 23:387-387.
- 534 6. Law JA, Jacobsen SE: Establishing, maintaining and modifying DNA methylation patterns in  
535 plants and animals. *Nature Reviews Genetics* 2010, 11:204-220.
- 536 7. Murat F, Peer YVd, Salse J: Decoding plant and animal genome plasticity from differential paleo-  
537 evolutionary patterns and processes. *Genome biology and evolution* 2012, 4:917-928.
- 538 8. Gladyshev EA, Arkhipova IR: Telomere-associated endonuclease-deficient Penelope-like  
539 retroelements in diverse eukaryotes. *Proceedings of the National Academy of Sciences* 2007,  
540 104:9352-9357.
- 541 9. Feng S, Jacobsen SE, Reik W: Epigenetic reprogramming in plant and animal development.  
542 *Science* 2010, 330:622-627.
- 543 10. Adams KL, Wendel JF: Polyploidy and genome evolution in plants. *Current opinion in plant*  
544 *biology* 2005, 8:135-141.
- 545 11. Soltis PS, Marchant DB, Van de Peer Y, Soltis DE: Polyploidy and genome evolution in plants.  
546 *Current opinion in genetics & development* 2015, 35:119-125.
- 547 12. Barker MS, Arrigo N, Baniaga AE, Li Z, Levin DA: On the relative abundance of autopolyploids  
548 and allopolyploids. *New Phytologist* 2016, 210:391-398.
- 549 13. Jiao Y, Wickett NJ, Ayyampalayam S, Chanderbali AS, Landherr L, Ralph PE, Tomsho LP, Hu Y,  
550 Liang H, Soltis PS, et al: Ancestral polyploidy in seed plants and angiosperms. *Nature* 2011,  
551 473:97-100.
- 552 14. Cui L, Wall PK, Leebens-Mack JH, Lindsay BG, Soltis DE, Doyle JJ, Soltis PS, Carlson JE,  
553 Arumuganathan K, Barakat A: Widespread genome duplications throughout the history of  
554 flowering plants. *Genome research* 2006, 16:738-749.
- 555 15. Jiao Y, Leebens-Mack J, Ayyampalayam S, Bowers JE, McKain MR, McNeal J, Rolf M, Ruzicka DR,  
556 Wafula E, Wickett NJ: A genome triplication associated with early diversification of the core  
557 eudicots. *Genome biology* 2012, 13:R3.
- 558 16. Hokamp K, McLysaght A, Wolfe KH: The 2R hypothesis and the human genome sequence. In  
559 *Genome Evolution*. Springer; 2003: 95-110
- 560 17. Panopoulou G, Poustka AJ: Timing and mechanism of ancient vertebrate genome duplications—  
561 the adventure of a hypothesis. *TRENDS in Genetics* 2005, 21:559-567.
- 562 18. Steinke D, Hoegg S, Brinkmann H, Meyer A: Three rounds (1R/2R/3R) of genome duplications  
563 and the evolution of the glycolytic pathway in vertebrates. *BMC biology* 2006, 4:16.
- 564 19. Tang H, Bomhoff MD, Briones E, Zhang L, Schnable JC, Lyons E: SynFind: compiling syntenic  
565 regions across any set of genomes on demand. *Genome Biol Evol* 2015.
- 566 20. Lyons E, Freeling M: How to usefully compare homologous plant genes and chromosomes as  
567 DNA sequences. *Plant Journal* 2008, 53:661-673.
- 568 21. Zhao T, Schranz E: Network Approaches for Plant Phylogenomic Synteny Analysis. *Current*  
569 *Opinion in Plant Biology* 2017, 36:129-134.
- 570 22. Zhao T, Holmer R, de Bruijn S, Angenent GC, van den Burg HA, Schranz ME: Phylogenomic  
571 Synteny Network Analysis of MADS-Box Transcription Factor Genes Reveals Lineage-Specific

- 572 Transpositions, Ancient Tandem Duplications, and Deep Positional Conservation. *The Plant Cell*  
573 2017, 29:1278-1292.
- 574 23. Cifelli RL, Davis BM: Marsupial origins. *Science* 2003, 302:1899-1900.
- 575 24. Bininda-Emonds OR, Cardillo M, Jones KE, MacPhee RD, Beck RM, Grenyer R, Price SA, Vos RA,  
576 Gittleman JL, Purvis A: The delayed rise of present-day mammals. *Nature* 2007, 446:507-512.
- 577 25. Magallón S, Gómez - Acevedo S, Sánchez - Reyes LL, Hernández - Hernández T: A  
578 metacalibrated time - tree documents the early rise of flowering plant phylogenetic diversity.  
579 *New Phytologist* 2015, 207:437-453.
- 580 26. Li Z, Defoort J, Tasdighian S, Maere S, Van de Peer Y, De Smet R: Gene duplicability of core genes  
581 is highly consistent across all angiosperms. *The Plant Cell Online* 2016, 28:326-344.
- 582 27. Jiao Y, Paterson AH: Polyploidy-associated genome modifications during land plant evolution.  
583 *Philos Trans R Soc Lond B Biol Sci* 2014, 369.
- 584 28. Imbeault M, Helleboid P-Y, Trono D: KRAB zinc-finger proteins contribute to the evolution of  
585 gene regulatory networks. *Nature* 2017, 543:550-554.
- 586 29. Jones JD, Vance RE, Dangl JL: Intracellular innate immune surveillance devices in plants and  
587 animals. *Science* 2016, 354:aaf6395.
- 588 30. Rosvall M, Bergstrom CT: Maps of random walks on complex networks reveal community  
589 structure. *Proceedings of the National Academy of Sciences* 2008, 105:1118-1123.
- 590 31. Lancichinetti A, Fortunato S: Community detection algorithms: a comparative analysis. *Physical*  
591 *review E* 2009, 80:056117.
- 592 32. Bond J, Roberts E, Springell K, Lizarraga S, Scott S, Higgins J, Hampshire DJ, Morrison EE, Leal GF,  
593 Silva EO: A centrosomal mechanism involving CDK5RAP2 and CENPJ controls brain size. *Nature*  
594 *genetics* 2005, 37:353.
- 595 33. Gul A, Hassan MJ, Hussain S, Raza SI, Chishti MS, Ahmad W: A novel deletion mutation in CENPJ  
596 gene in a Pakistani family with autosomal recessive primary microcephaly. *Journal of human*  
597 *genetics* 2006, 51:760-764.
- 598 34. Kudo H, Dunbar R: Neocortex size and social network size in primates. *Animal Behaviour* 2001,  
599 62:711-722.
- 600 35. Byrne RW, Corp N: Neocortex size predicts deception rate in primates. *Proceedings of the Royal*  
601 *Society B: Biological Sciences* 2004, 271:1693.
- 602 36. Levrero M, De Laurenzi V, Costanzo A, Gong J, Wang J, Melino G: The p53/p63/p73 family of  
603 transcription factors: overlapping and distinct functions. *J Cell Sci* 2000, 113:1661-1670.
- 604 37. Murray-Zmijewski F, Lane D, Bourdon J: p53/p63/p73 isoforms: an orchestra of isoforms to  
605 harmonise cell differentiation and response to stress. *Cell Death & Differentiation* 2006, 13:962-  
606 972.
- 607 38. Yoshida K, Maekawa T, Zhu Y, Renard-Guillet C, Chatton B, Inoue K, Uchiyama T, Ishibashi K-i,  
608 Yamada T, Ohno N: The transcription factor ATF7 mediates lipopolysaccharide-induced  
609 epigenetic changes in macrophages involved in innate immunological memory. *Nature*  
610 *immunology* 2015, 16:1034-1043.
- 611 39. Gupta S, Campbell D, Derijard B, Davis RJ: Transcription factor ATF2 regulation by the JNK signal  
612 transduction pathway. *SCIENCE-NEW YORK THEN WASHINGTON-* 1995:389-389.
- 613 40. Gozdecka M, Breitwieser W: The roles of ATF2 (activating transcription factor 2) in  
614 tumorigenesis. Portland Press Limited; 2012.
- 615 41. Bhoumik A, Fichtman B, DeRossi C, Breitwieser W, Kluger HM, Davis S, Subtil A, Meltzer P,  
616 Krajewski S, Jones N: Suppressor role of activating transcription factor 2 (ATF2) in skin cancer.  
617 *Proceedings of the National Academy of Sciences* 2008, 105:1674-1679.

- 618 42. Chowdhury AMA, Katoh H, Hatanaka A, Iwanari H, Nakamura N, Hamakubo T, Natsume T, Waku  
619 T, Kobayashi A: Multiple regulatory mechanisms of the biological function of NRF3 (NFE2L3)  
620 control cancer cell proliferation. *Scientific reports* 2017, 7:12494.
- 621 43. Sykiotis GP, Bohmann D: Keap1/Nrf2 signaling regulates oxidative stress tolerance and lifespan  
622 in *Drosophila*. *Developmental cell* 2008, 14:76-85.
- 623 44. Kobayashi A, Ito E, Toki T, Kogame K, Takahashi S, Igarashi K, Hayashi N, Yamamoto M:  
624 Molecular cloning and functional characterization of a new Cap'n'collar family transcription  
625 factor Nrf3. *Journal of Biological Chemistry* 1999, 274:6443-6452.
- 626 45. Lemons D, McGinnis W: Genomic evolution of Hox gene clusters. *Science* 2006, 313:1918-1922.
- 627 46. Ferrier DE, Holland PW: Ancient origin of the Hox gene cluster. *Nat Rev Genet* 2001, 2:33-38.
- 628 47. Brooke NM, Garcia-Fernandez J, Holland PW: The ParaHox gene cluster is an evolutionary sister  
629 of the Hox gene cluster. *Nature* 1998, 392:920-922.
- 630 48. Panganiban G, Rubenstein JL: Developmental functions of the Distal-less/Dlx homeobox genes.  
631 *Development* 2002, 129:4371-4386.
- 632 49. Srivastava M, Larroux C, Lu DR, Mohanty K, Chapman J, Degnan BM, Rokhsar DS: Early evolution  
633 of the LIM homeobox gene family. *BMC biology* 2010, 8:4.
- 634 50. Sussel L, Marin O, Kimura S, Rubenstein J: Loss of Nkx2. 1 homeobox gene function results in a  
635 ventral to dorsal molecular respecification within the basal telencephalon: evidence for a  
636 transformation of the pallidum into the striatum. *Development* 1999, 126:3359-3370.
- 637 51. Du T, Xu Q, Ocbina PJ, Anderson SA: NKX2. 1 specifies cortical interneuron fate by activating  
638 Lhx6. *Development* 2008, 135:1559-1567.
- 639 52. Pewzner-Jung Y, Ben-Dor S, Futerman AH: When do Lasses (longevity assurance genes) become  
640 CerS (ceramide synthases)? Insights into the regulation of ceramide synthesis. *Journal of*  
641 *Biological Chemistry* 2006, 281:25001-25005.
- 642 53. Schena M, Davis RW: HD-Zip proteins: members of an Arabidopsis homeodomain protein  
643 superfamily. *Proceedings of the National Academy of Sciences* 1992, 89:3894-3898.
- 644 54. Ariel FD, Manavella PA, Dezar CA, Chan RL: The true story of the HD-Zip family. *Trends in plant*  
645 *science* 2007, 12:419-426.
- 646 55. Mukherjee K, Brocchieri L, Bürglin TR: A comprehensive classification and evolutionary analysis  
647 of plant homeobox genes. *Molecular biology and evolution* 2009, 26:2775-2794.
- 648 56. Roeder AH, Ferrándiz C, Yanofsky MF: The role of the REPLUMLESS homeodomain protein in  
649 patterning the Arabidopsis fruit. *Current biology* 2003, 13:1630-1635.
- 650 57. Proveniers M, Rutjens B, Brand M, Smeekens S: The Arabidopsis TALE homeobox gene ATH1  
651 controls floral competency through positive regulation of FLC. *The Plant Journal* 2007, 52:899-  
652 913.
- 653 58. Coego A, Ramirez V, Gil MJ, Flors V, Mauch-Mani B, Vera P: An Arabidopsis homeodomain  
654 transcription factor, OVEREXPRESSOR OF CATIONIC PEROXIDASE 3, mediates resistance to  
655 infection by necrotrophic pathogens. *The Plant Cell* 2005, 17:2123-2137.
- 656 59. Nakamura M, Katsumata H, Abe M, Yabe N, Komeda Y, Yamamoto KT, Takahashi T:  
657 Characterization of the class IV homeodomain-leucine zipper gene family in Arabidopsis. *Plant*  
658 *physiology* 2006, 141:1363-1375.
- 659 60. Carabelli M, Turchi L, Ruzza V, Morelli G, Ruberti I: Homeodomain-Leucine Zipper II family of  
660 transcription factors to the limelight: central regulators of plant development. *Plant signaling*  
661 *& behavior* 2013, 8:e25447.
- 662 61. Scofield S, Dewitte W, Nieuwland J, Murray JA: The Arabidopsis homeobox gene SHOOT  
663 MERISTEMLESS has cellular and meristem - organisational roles with differential requirements  
664 for cytokinin and CYCD3 activity. *The Plant Journal* 2013, 75:53-66.

- 665 62. Li E, Wang S, Liu Y, Chen JG, Douglas CJ: OVATE FAMILY PROTEIN4 (OFP4) interaction with  
666 KNAT7 regulates secondary cell wall formation in *Arabidopsis thaliana*. *The Plant Journal* 2011,  
667 67:328-341.
- 668 63. Nakata M, Matsumoto N, Tsugeki R, Rikirsch E, Laux T, Okada K: Roles of the middle domain-  
669 specific WUSCHEL-RELATED HOMEBOX genes in early development of leaves in *Arabidopsis*.  
670 *The plant cell* 2012, 24:519-535.
- 671 64. Jain M, Tyagi AK, Khurana JP: Genome - wide identification, classification, evolutionary  
672 expansion and expression analyses of homeobox genes in rice. *The FEBS journal* 2008, 275:2845-  
673 2861.
- 674 65. Ruelens P, de Maagd RA, Proost S, Theissen G, Geuten K, Kaufmann K: FLOWERING LOCUS C in  
675 monocots and the tandem origin of angiosperm-specific MADS-box genes. *Nat Commun* 2013,  
676 4:2280.
- 677 66. Cheng SF, van den Bergh E, Zeng P, Zhong X, Xu JJ, Liu X, Hofberger J, de Bruijn S, Bhide AS,  
678 Kuelahoglu C, et al: The *Tarenaya hassleriana* Genome Provides Insight into Reproductive Trait  
679 and Genome Evolution of Crucifers. *Plant Cell* 2013, 25:2813-2830.
- 680 67. Csardi G, Nepusz T: The igraph software package for complex network research. *InterJournal,*  
681 *Complex Systems* 2006, 1695:1-9.
- 682 68. Dixon P: VEGAN, a package of R functions for community ecology. *Journal of Vegetation Science*  
683 2003, 14:927-930.  
684  
685
